# Supplementary material
Source: publisher figshare collection journal article supplement (https://acs.figshare.com/ndownloader/files/4612651)
Supplement: Supplementary file 1 [file 4612651]

Table S1. Summary of trimers between intact globin chains for in vitro samples (RBCs incubated with DCVCS 0.9-450  $\mu$ M). See explanation in Table 2 (manuscript)

|                                    | DCVCS as cross-linker<br>without additional<br>monoadducts                                                                                                             | DCVCS as cross-linker plus following monoadducts                                                                                         |                                                                                                          |                                 |
|------------------------------------|------------------------------------------------------------------------------------------------------------------------------------------------------------------------|------------------------------------------------------------------------------------------------------------------------------------------|----------------------------------------------------------------------------------------------------------|---------------------------------|
|                                    |                                                                                                                                                                        | DCVCS                                                                                                                                    | DCVCS-GSH                                                                                                | DCVCS-Cys                       |
| <b>DCVCS 0.9 <math>\mu</math>M</b> |                                                                                                                                                                        |                                                                                                                                          |                                                                                                          |                                 |
| Mass <sub>theo</sub> (Da)          | 45865; 46631; 46645;<br>46675; 46733                                                                                                                                   | 47035; 47593; 47752                                                                                                                      | 47563; 47729; 47884                                                                                      | -                               |
| Mass <sub>obs</sub> (Da)           | 45869; 46629; 46650;<br>46675; 46735                                                                                                                                   | 47035; 47598; 47748                                                                                                                      | 47564; 47727; 47884                                                                                      |                                 |
| Cross-links                        | $\alpha 1\alpha 1\alpha 2+2cl$ ; $\alpha 2\alpha 2\beta 1+3cl$ ;<br>$\alpha 2\alpha 2\beta 2+3cl$ ; $\alpha 1\alpha 2\beta 1+3cl$ ;<br>$\alpha 1\alpha 1\beta 2+3cl$ ; | $\alpha 2\alpha 2\beta 2+3cl+2$ ; $\beta 2\alpha 1\beta 2+3cl+1$ ;<br>$\alpha 2\beta 1\beta 1+2cl+2$                                     | $\alpha 2\alpha 2\beta 1+3cl+2$ ; $\alpha 1\alpha 1\alpha 2+2cl+4$ ;<br>$\alpha 2\beta 2\alpha 2+2cl+3$  |                                 |
| <b>DCVCS 4.5 <math>\mu</math>M</b> |                                                                                                                                                                        |                                                                                                                                          |                                                                                                          |                                 |
| Mass <sub>theo</sub> (Da)          | 46645                                                                                                                                                                  | 46667; 46681; 46725; 46950                                                                                                               | 46490                                                                                                    | 48079                           |
| Mass <sub>obs</sub> (Da)           | 46650                                                                                                                                                                  | 46663; 46684; 46730; 46950                                                                                                               | 46492                                                                                                    | 48083                           |
| Cross-links                        | $\alpha 2\alpha 2\beta 2+3cl$                                                                                                                                          | $\alpha 2\alpha 2\beta 1+2cl+1$ ; $\alpha 2\alpha 2\beta 2+2cl+1$ ;<br>$\alpha 1\alpha 2\beta 2+2cl+1$ ; $\alpha 1\alpha 1\beta 1+2cl+2$ | $\alpha 1\alpha 1\alpha 2+3cl+1$                                                                         | $\alpha 1\beta 2\beta 2+2cl+3$  |
| <b>DCVCS 9 <math>\mu</math>M</b>   |                                                                                                                                                                        |                                                                                                                                          |                                                                                                          |                                 |
| Mass <sub>theo</sub> (Da)          | 45865; 46631; 46689                                                                                                                                                    | 47752; 46681; 46725; 46755                                                                                                               | 46490; 47563; 47729                                                                                      | 47519                           |
| Mass <sub>obs</sub> (Da)           | 45860; 46634; 46688                                                                                                                                                    | 47749; 46677; 46727; 46758                                                                                                               | 46492; 47558; 47731                                                                                      | 47519                           |
| Cross-links                        | $\alpha 1\alpha 1\alpha 2+3cl$ ; $\alpha 2\alpha 2\beta 1+3cl$ ;<br>$\alpha 1\alpha 2\beta 2+3cl$                                                                      | $\alpha 2\beta 1\beta 1+2cl+3$ ; $\alpha 2\alpha 2\beta 2+2cl+1$ ;<br>$\alpha 1\alpha 2\beta 2+2cl+1$ ; $\alpha 1\alpha 1\beta 1+2cl+1$  | $\alpha 1\alpha 1\alpha 2+3cl+1$ ; $\alpha 2\alpha 2\beta 1+3cl+2$ ;<br>$\alpha 1\alpha 1\alpha 2+2cl+4$ | $\alpha 1\beta 2\beta 2+2cl+1$  |
| <b>DCVCS 90 <math>\mu</math>M</b>  |                                                                                                                                                                        |                                                                                                                                          |                                                                                                          |                                 |
| Mass <sub>theo</sub> (Da)          | 46645; 45821; 46689                                                                                                                                                    | 46175; 46725; 46667                                                                                                                      | 47729; 48356                                                                                             | 47134                           |
| Mass <sub>obs</sub> (Da)           | 46648; 45820; 46687                                                                                                                                                    | 46177; 46730; 46665                                                                                                                      | 47730; 48352                                                                                             | 47129                           |
| Cross-links                        | $\alpha 2\alpha 2\beta 2+3cl$ ; $\alpha 1\alpha 2\alpha 2+2cl$ ;<br>$\alpha 1\alpha 2\beta 2+3cl$                                                                      | $\alpha 1\alpha 2\alpha 2+3cl+1$ ; $\alpha 1\alpha 2\beta 1+2cl+1$ ;<br>$\alpha 2\alpha 2\beta 1+2cl+1$                                  | $\alpha 1\alpha 1\alpha 2+2cl+4$ ; $\beta 1\beta 2\beta 2+2cl+1$                                         | $\alpha 1\alpha 1\beta 2+2cl+2$ |
| <b>DCVCS 450 <math>\mu</math>M</b> |                                                                                                                                                                        |                                                                                                                                          |                                                                                                          |                                 |
| Mass <sub>theo</sub> (Da)          | 46645                                                                                                                                                                  | 46667; 46725; 47593; 47752                                                                                                               | 47884; 47563; 47729                                                                                      | 48079                           |
| Mass <sub>obs</sub> (Da)           | 46643                                                                                                                                                                  | 46668; 46728; 47593; 47748                                                                                                               | 47882; 47562; 47732                                                                                      | 48083                           |
| Cross-links                        | $\alpha 2\alpha 2\beta 2+3cl$                                                                                                                                          | $\alpha 2\alpha 2\beta 1+2cl+1$ ; $\alpha 1\alpha 2\beta 2+2cl+1$ ;<br>$\beta 2\alpha 1\beta 2+3cl+1$ ; $\alpha 2\beta 1\beta 1+2cl+3$   | $\alpha 2\beta 2\alpha 2+2cl+3$ ; $\alpha 2\alpha 2\beta 1+3cl+2$ ;<br>$\alpha 1\alpha 1\alpha 2+2cl+4$  | $\alpha 1\beta 2\beta 2+2cl+3$  |



Table S2. Summary of dimers between intact globin chains for in vivo samples (SD rats dosed with DCVCS 230  $\mu\text{mol/kg}$ ). Cross-links containing DCVCS or NA-DCVCS as cross-linkers (between chains) with and without monoadducts are shown. See explanation for formation of DCVCS cross-link in Table 2 (manuscript). NA-DCVCS cross-link: 1cl (+201 Da) = 1 NA-DCVCS cross-linker (between chains), 2cl (+201\*2 Da) = 2 NA-DCVCS cross-linkers, 3cl (+201\*3 Da) = 3 NA-DCVCS cross-linkers. In addition to monoadducts listed in Table 2 (manuscript), other monoadducts included: NA-DCVCS (+237 Da, +237\*2 Da, and +237\*3 Da), NA-DCVCS-GSH (+508 Da with up to 3 adducts as described above for NA-DCVCS), NA-DCVCS-Cys (+322 Da with up to 3 adducts as described above for NA-DCVCS). Example:  $\alpha\beta$ +1cl+2 defines a cross-link between the stated chains with 1 cross-linker (DCVCS or NA-DCVCS) and 2 monoadducts.

|                                                         | Rat 1                     |                          |                                                                   | Rat 2                     |                          |                                                                   |
|---------------------------------------------------------|---------------------------|--------------------------|-------------------------------------------------------------------|---------------------------|--------------------------|-------------------------------------------------------------------|
|                                                         | Mass <sub>theo</sub> (Da) | Mass <sub>obs</sub> (Da) | Cross-links                                                       | Mass <sub>theo</sub> (Da) | Mass <sub>obs</sub> (Da) | Cross-links                                                       |
| DCVCS as cross-linker without additional monoadducts    | 30714                     | 30716                    | $\alpha 1\alpha 1+2\text{cl}$                                     | -                         |                          |                                                                   |
| DCVCS as cross-linker plus following monoadducts:       |                           |                          |                                                                   |                           |                          |                                                                   |
| DCVCS                                                   | 31247                     | 31246                    | $\alpha 2\alpha 2+1\text{cl}+4$                                   | 31245                     | 31247                    | $\alpha 2\alpha 2+1\text{cl}+4$                                   |
| DCVCS-GSH                                               | 30977; 31136              | 30974; 31137             | $\alpha 1\alpha 2+1\text{cl}+1$ ; $\alpha 1\alpha 2+2\text{cl}+1$ | 30975; 31134              | 30973; 31138             | $\alpha 1\alpha 2+1\text{cl}+1$ ; $\alpha 1\alpha 2+2\text{cl}+1$ |
| DCVCS-Cys                                               | -                         |                          |                                                                   | -                         |                          |                                                                   |
| NA-DCVCS                                                | -                         |                          |                                                                   | -                         |                          |                                                                   |
| NA-DCVCS-GSH                                            | 32035                     | 32039                    | $\alpha 1\alpha 2+1\text{cl}+3$                                   | -                         |                          |                                                                   |
| NA-DCVCS-Cys                                            | -                         |                          |                                                                   | -                         |                          |                                                                   |
| NA-DCVCS as cross-linker without additional monoadducts | -                         |                          |                                                                   | -                         |                          |                                                                   |
| NA-DCVCS as cross-linker plus following monoadducts:    |                           |                          |                                                                   |                           |                          |                                                                   |
| DCVCS                                                   | -                         |                          |                                                                   | -                         |                          |                                                                   |
| DCVCS-GSH                                               | 31928                     | 31932                    | $\alpha 1\beta 2+2\text{cl}+1$                                    | -                         |                          |                                                                   |
| DCVCS-Cys                                               | 32056                     | 32055                    | $\alpha 2\beta 2+1\text{cl}+3$                                    | 32057                     | 32056                    | $\alpha 2\beta 2+1\text{cl}+3$                                    |
| NA-DCVCS                                                | -                         |                          |                                                                   | -                         |                          |                                                                   |
| NA-DCVCS-GSH                                            | 32941                     | 32945                    | $\beta 2\beta 2+1\text{cl}+2$                                     | -                         |                          |                                                                   |
| NA-DCVCS-Cys                                            | -                         |                          |                                                                   | -                         |                          |                                                                   |



Table S3. Summary of trimers between intact globin chains for in vivo samples (SD rats dosed with DCVCS 230  $\mu\text{mol/kg}$ ). See explanations in Table S2 \*Experimental mass represents two different types of trimers.

|                                                         | Rat 1                     |                          |                                                                             | Rat 2                     |                          |                                                                                 |
|---------------------------------------------------------|---------------------------|--------------------------|-----------------------------------------------------------------------------|---------------------------|--------------------------|---------------------------------------------------------------------------------|
|                                                         | Mass <sub>theo</sub> (Da) | Mass <sub>obs</sub> (Da) | Cross-links                                                                 | Mass <sub>theo</sub> (Da) | Mass <sub>obs</sub> (Da) | Cross-links                                                                     |
| DCVCS as cross-linker without additional monoadducts    | 46576; 46722              | 46572; 46717             | $\alpha 1\alpha 1\beta 2+2\text{cl}$ ; $\alpha 1\alpha 1\beta 1+3\text{cl}$ | -                         |                          |                                                                                 |
| DCVCS as cross-linker plus following monoadducts:       |                           |                          |                                                                             |                           |                          |                                                                                 |
| DCVCS                                                   | -                         |                          |                                                                             | -                         |                          |                                                                                 |
| DCVCS-GSH                                               | -                         |                          |                                                                             | 46938                     | 46937*                   | $\alpha 2\alpha 2\beta 1+2\text{cl}+1$                                          |
| DCVCS-Cys                                               | 47476                     | 47472                    | $\alpha 2\beta 2\beta 2+2\text{cl}+1$                                       | 47475; 46864              | 47472; 46861             | $\alpha 2\beta 2\beta 2+2\text{cl}+1$ ; $\alpha 1\alpha 1\alpha 2+3\text{cl}+3$ |
| NA-DCVCS                                                | -                         |                          |                                                                             | -                         |                          |                                                                                 |
| NA-DCVCS-GSH                                            | -                         |                          |                                                                             | -                         |                          |                                                                                 |
| NA-DCVCS-Cys                                            | -                         |                          |                                                                             | -                         |                          |                                                                                 |
| NA-DCVCS as cross-linker without additional monoadducts | -                         |                          |                                                                             | 46658                     | 46655                    | $\alpha 1\alpha 1\beta 1+2\text{cl}$                                            |
| NA-DCVCS as cross-linker plus following monoadducts:    |                           |                          |                                                                             |                           |                          |                                                                                 |
| DCVCS                                                   | 47896                     | 47891                    | $\alpha 1\beta 2\beta 2+2\text{cl}+3$                                       | -                         |                          |                                                                                 |
| DCVCS-GSH                                               | -                         |                          |                                                                             | 47532                     | 47531                    | $\alpha 1\alpha 2\beta 2+2\text{cl}+2$                                          |
| DCVCS-Cys                                               | 47591                     | 47587                    | $\alpha 1\beta 2\beta 2+2\text{cl}+3$                                       | 46185; 46938              | 46184; 46937*            | $\alpha 1\alpha 1\beta 2+2\text{cl}+1$                                          |
| NA-DCVCS                                                | -                         |                          |                                                                             | -                         |                          |                                                                                 |
| NA-DCVCS-GSH                                            | -                         |                          |                                                                             | -                         |                          |                                                                                 |
| NA-DCVCS-Cys                                            | -                         |                          |                                                                             | -                         |                          |                                                                                 |



In vivo results for rats treated with 230  $\mu\text{mol/kg}$  DCVCS that refer to Tables S2 and S3 of the Supplemental Material

**Globin chain cross-links.** Analyses of intermolecular cross-links between various chains with DCVCS as a cross-linker (+159 Da) revealed a dimer between  $\alpha 1$  chains (Table S2) and 2 trimers ( $\alpha 1\alpha 1\beta 1$ ,  $\alpha 1\alpha 1\beta 2$ ) in rat 1 (Table S3). The data was also analyzed for cross-links with NA-DCVCS (+201 Da) as cross-linker. Interestingly, 1 trimer ( $\alpha 1\alpha 1\beta 1$ ) of this kind was detected with the other rat (rat 2; Table S3).

**Globin chain cross-links with additional DCVCS monoadducts.** Both rats had a dimer ( $\alpha 2\alpha 2$ ) with 1 DCVCS moiety as a cross-linker (+159 Da) and four additional DCVCS moieties (+195 Da) as monoadducts (Table S2). Rat 1 also contained a trimer ( $\alpha 1\beta 1\beta 2$ ) with 2 NA-DCVCS moieties as cross-linkers (+201 Da) and 3 DCVCS moieties as monoadducts (Table S3).

**Globin chain cross-links with additional DCVCS-GSH monoadducts.** There were 2 dimers with DCVCS moieties as cross-linkers (+159 Da) between  $\alpha 1$  and  $\alpha 2$  chains with a DCVCS-GSH adduct (+466 Da) in each rat (Table S2). It was not possible to determine if one of the rats (rat 2) also had an additional trimer ( $\alpha 2\alpha 2\beta 1$ ) because the mass for that cross-link matches a different type of cross-link ( $\alpha 1\alpha 1\beta 2$  with additional DCVCS-Cys monoadduct; Table S3). Each rat also had 1 cross-link ( $\alpha 1\beta 2$  and  $\alpha 1\alpha 2\beta 2$ , respectively) containing 2 NA-DCVCS moieties as cross-linkers (+201 Da) that included 1 and 2 DCVCS-GSH adducts, respectively (Table S2 and S3).

**Globin chain cross-links with additional DCVCS-Cys.** The presence of cross-links containing DCVCS-Cys was also analyzed. Neither rat globin contained dimers with DCVCS as a cross-linker (+159 Da) and containing DCVCS-Cys monoadducts (+280 Da) (Table S2), however, one (rat 1) and two (rat 2) trimers were detected, with trimer ( $\alpha 2\beta 2\beta 2$ ) being present in both rats



(Table S3). With NA-DCVCS as a cross-linker (+201 Da), one dimer ( $\alpha_2\beta_2$ ) (Table S2) and one trimer (Table S3) were detected in each rat. Overall, 4 DCVCS-Cys moieties were detected on cross-links for each rat (Table S3).
